# Supplementary material for: Genome-wide identification and characterization of tissue-specific non-coding RNAs in black pepper (Piper nigrum L.)
Source: Front Plant Sci. 2023 Mar 16;14:1079221. doi: 10.3389/fpls.2023.1079221 (PMC10060637; doi:10.3389/fpls.2023.1079221)
Supplement: Supplementary file 2 [file Table_2.xlsx]

## Sheet: Sheet2
Supplementary table 2: Read summary and alignment statistics
Sample tissue	SRA ID	Raw reads	Clean reads	Percent clean reads	Percent aligned reads
fruit	ERR4099794	14194788	13773803	97.03	88.09
	ERR4099795	14823871	14404548	97.17	91.53
	ERR4099796	14461215	13962190	96.54	91.79
	ERR4099797	14415182	13944931	96.73	88.81
	ERR4099798	11355366	10863632	95.66	90.93
	ERR4099799	11500159	11013691	95.7699	91.55
	SRR1164727	29456321	28867301	98.0004	83.56
	SRR14876427	33252663	32535367	97.8429	70.04
	SRR14876428	27504388	26875985	97.7153	75.1
	SRR14876429	35316203	34517863	97.7395	70.86
	SRR14876430	20331030	19836270	97.5665	76.51
	SRR14876431	40976058	40084249	97.8236	68.88
	SRR14876432	42311861	41243594	97.4753	73.12
	SRR14876433	16922048	16552542	97.8164	69.09
	SRR14876434	45840323	44767814	97.6603	73.39
	SRR8816471	31897206	31510002	98.7861	88.43
	SRR8816472	27207182	26877612	98.7887	87.12
	SRR8816473	27088130	26783436	98.8752	86.39
	SRR8816474	22871946	22460456	98.2009	88.78
	SRR8816475	26697423	26398347	98.8798	88.56
	SRR8816476	32161232	31774245	98.7967	88.93
	SRR8816477	20195451	19933063	98.7008	87.14
	SRR8816478	26836359	26531460	98.8639	89.69
	SRR8816480	23067788	22764260	98.6842	83.89
	SRR8816481	24631657	24354934	98.8766	87.57
	SRR8816482	26171308	25880149	98.8875	86.91
	SRR8816483	28957692	28623676	98.8465	85.86
	SRR1818148	26344369	25500735	96.7977	94.26
leaf	ERR4099800	11359185	10991997	96.7675	83.34
	ERR4099801	11314838	10898391	96.3195	89.32
	ERR4099802	14422919	13954318	96.751	89.19
	SRR1781514	18191538	17764701	97.6537	94.38
	SRR8446741	17256552	16920551	98.0529	92.4
	SRR8446742	16396607	16113864	98.2756	92.46
	SRR8816484	29760227	29418605	98.8521	91.9
	SRR8816485	28546882	28208847	98.8159	93.09
	SRR8816491	27849189	27455659	98.5869	90.38
	SRR1776865	38501050	36531097	94.8834	92.59
	SRR14876425	23878982	23469807	98.2865	78.4
	SRR14876426	25446962	24922373	97.9385	79.73
panicle	ERR4099803	10868104	10424817	95.9212	89.06
	ERR4099804	11049524	10735455	97.1576	85.49
	ERR4099805	8740907	8460736	96.7947	88.63
root	SRR8816486	23877704	23571664	98.7183	89.1
	SRR8816487	32391757	32039524	98.9126	88.59
	SRR8816492	28433808	28127853	98.924	89.07
	SRR1777719	26715230	26027826	97.4269	94.13
stem	SRR8816469	27912988	27573058	98.7822	87.34
	SRR8816470	23921044	23650549	98.8692	88.16
	SRR8816493	27332113	26930549	98.5308	87.9
flower	SRR8876488	24675402	24304832	98.4982	81.74
	SRR8876489	29002147	26675432	91.9774	77.41
	SRR8876490	23444170	23196633	98.9441	77.32
		1278079048	1251005293	97.8817	85.6208
